# Supplementary material for: Sequential Conia-ene-type cyclization and Negishi coupling by cooperative functions of B(C6F5)3, ZnI2, Pd(PPh3)4 and an amine
Source: Royal Society of Chemistry journal article supplement (doi:10.1039/d0ob01678k), 2020-01-01

**Sequential Conia-Ene-Type Cyclizations and Negishi Coupling by  
Cooperative Functions of  $B(C_6F_5)_3$ ,  $ZnI_2$ ,  $Pd(PPh_3)_4$  and an Amine**

*Min Cao,<sup>a</sup> Ahmet Yesilcimen,<sup>a</sup> Soumil Prasad,<sup>a</sup> Jason Genova,<sup>a</sup> Tanner Myers,<sup>a</sup> and  
Masayuki Wasa<sup>\*a</sup>*

*Department of Chemistry, Merkert Chemistry Center, Boston College, Chestnut Hill,  
Massachusetts 02467, United States*

|                                                                                              |      |
|----------------------------------------------------------------------------------------------|------|
| 1. Procedures, Materials and Instrumentation                                                 | S-2  |
| 2. Experimental Section                                                                      | S-4  |
| 2.1 Optimizations Studies                                                                    | S-4  |
| 2.2 General Procedures for the Sequential Conia-Ene-Type Cyclization and<br>Negishi Coupling | S-5  |
| 3. Analytical Data                                                                           | S-6  |
| 4. References                                                                                | S-13 |
| 5. NMR Spectra for New Compounds                                                             | S-14 |

## 1. Procedures, Materials and Instrumentation

### 1.1 General Experimental Procedures

All reactions were performed in standard, oven-dried glassware fitted with rubber septa under an inert atmosphere of nitrogen unless otherwise described. Stainless steel syringes or cannulas were used to transfer air- and moisture-sensitive liquids. Reported concentrations refer to solution volumes at room temperature. Evaporation and concentration *in vacuo* were performed using house vacuum (ca. 40 mm Hg). Column chromatography was performed with SiliaFlash® 60 (40–63 micron) silica gel from Silicycle. Thin layer chromatography (TLC) was used for reaction monitoring and product detection using pre-coated glass plates covered with 0.25 mm silica gel with fluorescent indicator; visualization by UV light ( $\lambda_{\text{ex}} = 254 \text{ nm}$ ) or  $\text{KMnO}_4$  stain.

### 1.2 Materials

Reagents were purchased in reagent grade from commercial suppliers and used without further purification, unless otherwise described.  $\text{H}_2\text{O}$ , in synthetic procedures, refers to distilled water. Substrates **1b–1g** and **1h** were synthesized according to the literature procedures.<sup>1</sup>

### 1.3 Instrumentation

Proton nuclear magnetic resonance ( $^1\text{H}$  NMR) spectra and proton-decoupled carbon nuclear magnetic resonance ( $^{13}\text{C}$   $\{^1\text{H}\}$  NMR) spectra were recorded at  $25^\circ\text{C}$  (unless stated otherwise) on Inova 600 (600 MHz) or Varian Unity/Inova 500 (500 MHz) or Oxford AS400 (400 MHz) spectrometers at the Boston College nuclear magnetic resonance facility. Chemical shifts for protons are reported in parts per million downfield from tetramethylsilane and are referenced to residual protium in the NMR solvent. Chemical shifts for carbon are reported in parts per million downfield from tetramethylsilane and are referenced to the carbon resonances of the solvent. The solvent peak was referenced to 0 ppm for  $^1\text{H}$  for tetramethylsilane and 77.0 ppm for  $^{13}\text{C}$  for  $\text{CDCl}_3$ . Data are represented as follows: chemical shift, integration, multiplicity (br = broad, s = singlet, d = doublet, t = triplet, q = quartet, qn = quintet, sp = septet, m = multiplet), coupling constants in Hertz (Hz).

Infrared spectra were recorded on a Bruker FT-IR Alpha (ATR mode) spectrophotometer. Data are represented as follows: frequency of absorption ( $\text{cm}^{-1}$ ). High-resolution mass

spectrometry was performed on a JEOL AccuTOF-DART (positive mode) or Agilent 6220 TOF-ESI (positive mode) at the Mass Spectrometry Facility, Boston College.

#### **1.4 Abbreviations Used**

DART = direct analysis in real time, H<sub>2</sub>O = water, HR = high-resolution, MS = mass spectrometry, NA = not applicable, PMP = 1,2,2,6,6-pentamethylpiperidine, TOF = time-of-flight.

## 2. Experimental Section

### 2.1 Optimization Studies

#### Experimental Procedure for Optimization of Reaction Parameters (see Tables 1 in the manuscript)

To a 7.0 mL oven-dried vial was added, 1-phenylhept-5-yn-1-one **1b** (18.6 mg, 0.10 mmol),  $B(C_6F_5)_3$ , PMP,  $ZnI_2$ ,  $Pd(PPh_3)_4$  and  $CH_2Cl_2$  (0.5 mL) under nitrogen atmosphere. The resulting mixture was allowed to stir at 22 °C for 12 h. Upon completion, the reaction mixture was diluted with  $CH_2Cl_2$ , and concentrated *in vacuo*. The product yield was determined by the  $^1H$  NMR analysis of the unpurified product mixture using mesitylene as the internal standard.

#### Experiments for Evaluation of Substrate Structure

When alkynyl ketone substrate containing a terminal alkyne unit (**1h**) was used, the transformation was inefficient (<5% of **4n** and **2h** were obtained). In addition, when allyl iodide was used under the standard reaction condition, we only obtained the Conia-ene-type product **2b**. The use of bromobenzene resulted in the formation of Conia-ene-type product **2b**. With more bulky aromatic iodides such as 2,6-dimethyliodobenzene **3k** and 1-iodo-2-methoxynaphthalene **3l**, we only obtained the Conia-ene-type product **2b**.

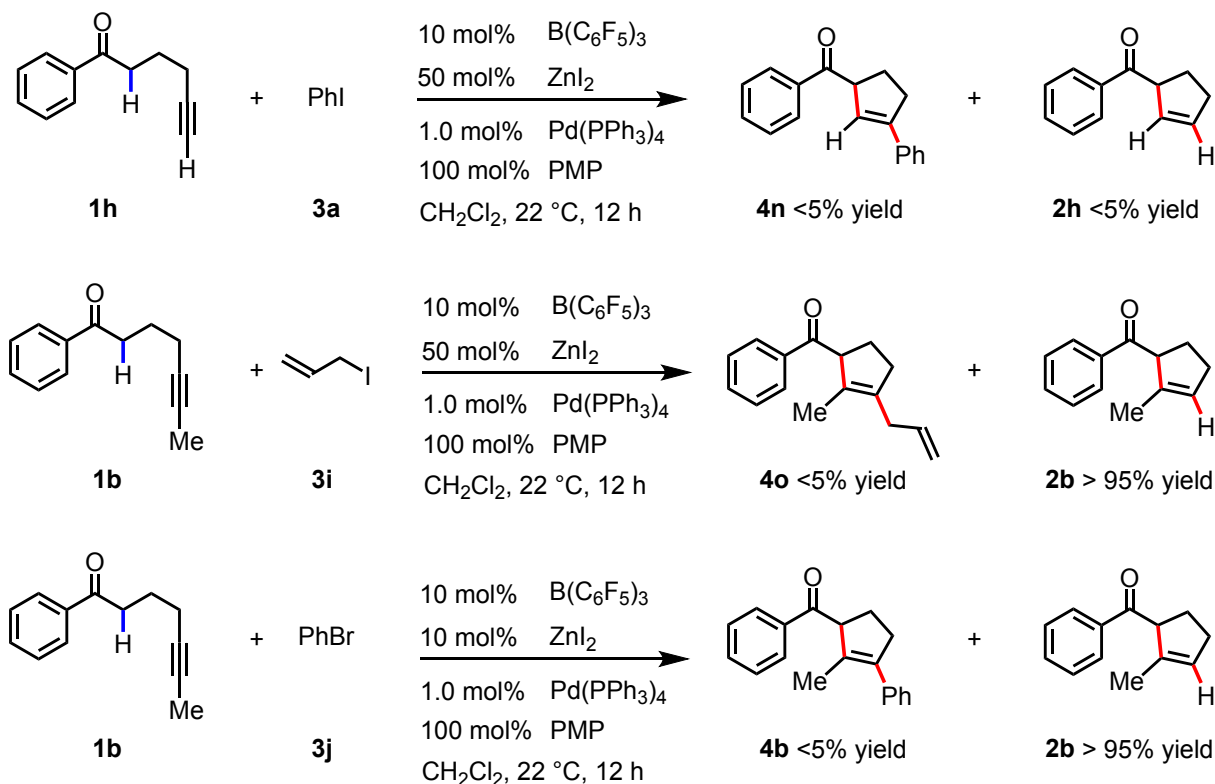

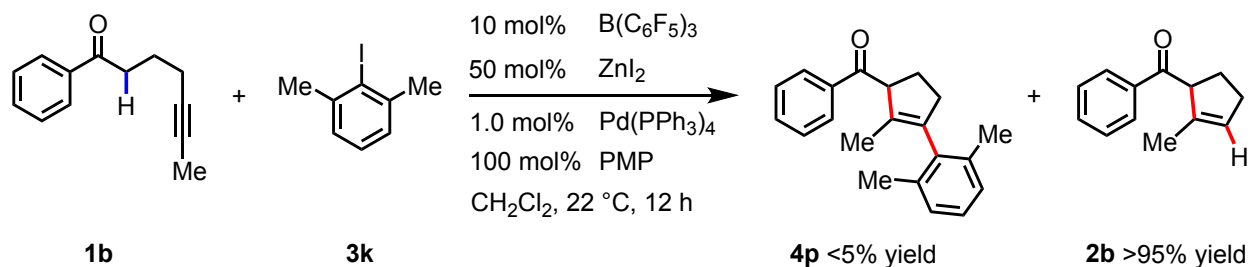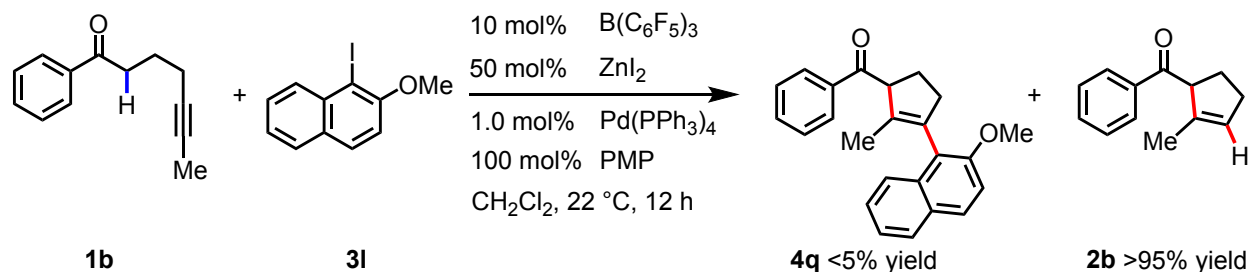

## 2.2 General Procedures for the Sequential Conia-Ene-Type Cyclization and Negishi Coupling (See Table 2 in the manuscript)

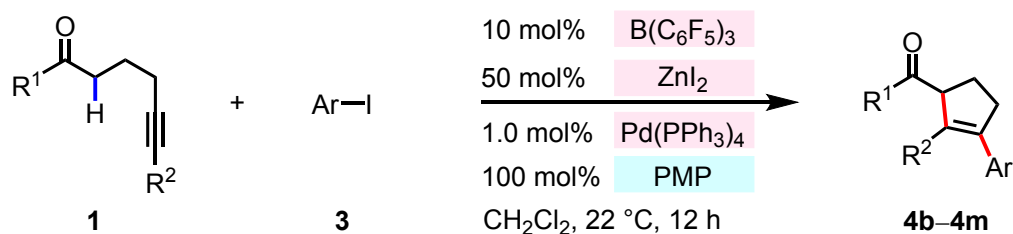

To a 7.0 mL oven-dried vial was added substrate **1** (0.10 mmol),  $B(C_6F_5)_3$  (10 mol%), PMP (100 mol%),  $ZnI_2$  (50 mol%),  $Pd(PPh_3)_4$  (1.0 mol%) and  $CH_2Cl_2$  (0.5 mL) under nitrogen atmosphere. The resulting mixture was allowed to stir at 22 °C for 12 h. Upon completion, the reaction mixture was diluted with  $CH_2Cl_2$ , concentrated *in vacuo* and purified by silica gel column chromatography.

### 3. Analytical Data

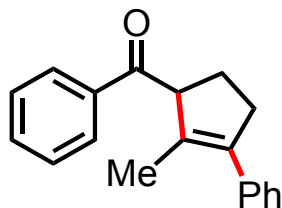

#### (2-methyl-3-phenylcyclopent-2-en-1-yl)(phenyl)methanone (**4b**)

According to the General Procedure, 1-phenylnon-5-yn-1-one **1b** (18.6 mg, 0.10 mmol) reacted with iodobenzene **3a** (24.5 mg, 0.12 mmol) following the general procedure. After purification by column chromatography (Hexane:Ethyl acetate = 40:1), **4b** was obtained as a colorless liquid (24.9 mg, 95%). <sup>1</sup>H NMR (500 MHz, CDCl<sub>3</sub>) δ 8.04 (d, *J* = 7.4 Hz, 2H), 7.57 (t, *J* = 7.3 Hz, 1H), 7.49 (t, *J* = 7.7 Hz, 2H), 7.40 – 7.32 (m, 4H), 7.28 – 7.21 (m, 1H), 4.63 – 4.56 (m, 1H), 2.86 (t, *J* = 6.4 Hz, 2H), 2.45 – 2.33 (m, 1H), 2.16 – 2.03 (m, 1H), 1.80 (s, 3H); <sup>13</sup>C NMR (126 MHz, CDCl<sub>3</sub>) 202.2, 139.1, 137.9, 137.2, 133.1, 133.0, 128.7, 128.6, 128.1, 127.9, 126.7, 77.3, 77.0, 76.8, 58.9, 36.4, 27.7, 14.9; IR (neat) 1717, 1674, 1176, 1157, 850, 760, 695 cm<sup>-1</sup>; HRMS (DART) *m/z* Calcd for C<sub>19</sub>H<sub>19</sub>O (MH<sup>+</sup>): 263.1430; found: 263.1439.

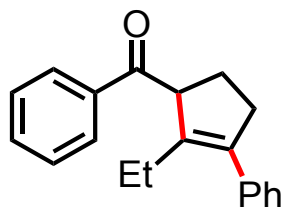

#### (2-ethyl-3-phenylcyclopent-2-en-1-yl)(phenyl)methanone (**4c**)

According to the General Procedure, 1-phenyloct-5-yn-1-one **1c** (20.0 mg, 0.10 mmol) reacted with iodobenzene **3a** (24.5 mg, 0.12 mmol) following the general procedure. After purification by column chromatography (Hexane:Ethyl acetate = 40:1), **4c** was obtained as a colorless liquid (27.5 mg, 98%). <sup>1</sup>H NMR (500 MHz, CDCl<sub>3</sub>) δ 8.00 – 7.92 (m, 2H), 7.49 (t, *J* = 6.7 Hz, 1H), 7.40 (t, *J* = 7.6 Hz, 2H), 7.31 – 7.21 (m, 4H), 7.16 (t, *J* = 6.9 Hz, 1H), 4.67 – 4.58 (m, 1H), 2.85 – 2.77 (m, 1H), 2.71 (dd, *J* = 16.7, 7.2 Hz, 1H), 2.43 – 2.23 (m, 3H), 2.09 – 1.90 (m, 2H), 0.84 (t, *J* = 7.6 Hz, 3H); <sup>13</sup>C NMR (151 MHz, CDCl<sub>3</sub>) δ 202.33, 139.04, 139.01, 138.06, 137.07, 132.94, 128.64, 128.45, 128.06, 127.82, 126.65, 55.45, 36.73, 28.12, 21.21, 12.87; IR (neat) 2961, 1677, 1595,

1208, 1177, 761, 698  $\text{cm}^{-1}$ ; HRMS (DART)  $m/z$  Calcd for  $\text{C}_{20}\text{H}_{21}\text{O}$  ( $\text{MH}^+$ ): 277.1587; found: 277.1586.

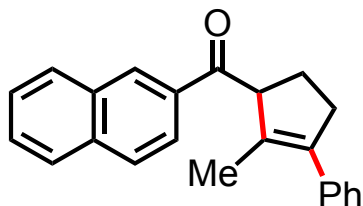

**(2-methyl-3-phenylcyclopent-2-en-1-yl)(naphthalen-2-yl)methanone (4d)**

According to the General Procedure, 1-(naphthalen-2-yl)hept-5-yn-1-one **1d** (23.6 mg, 0.10 mmol) reacted with iodobenzene **3a** (24.5 mg, 0.12 mmol) following the general procedure. After purification by column chromatography (Hexane:Ethyl acetate = 40:1), **4d** was obtained as a yellow solid (28.5 mg, 91%).  $^1\text{H NMR}$  (400 MHz,  $\text{CDCl}_3$ )  $\delta$  8.49 (s, 1H), 8.02 (d,  $J = 8.6$  Hz, 1H), 7.90 (d,  $J = 8.0$  Hz, 1H), 7.82 (dd,  $J = 13.2, 8.4$  Hz, 2H), 7.50 (dt,  $J = 19.7, 7.0$  Hz, 2H), 7.28 (d,  $J = 4.4$  Hz, 4H), 7.17 (dd,  $J = 7.8, 3.5$  Hz, 1H), 4.68 (t,  $J = 7.6$  Hz, 1H), 2.90 – 2.72 (m, 2H), 2.47 – 2.28 (m, 1H), 2.10 (dq,  $J = 13.6, 6.9$  Hz, 1H), 1.75 (s, 3H);  $^{13}\text{C NMR}$  (151 MHz,  $\text{CDCl}_3$ )  $\delta$  202.2, 139.1, 137.8, 135.5, 134.5, 133.2, 132.6, 130.2, 129.6, 128.5, 128.4, 128.1, 127.9, 127.7, 126.7, 126.6, 124.3, 58.9, 36.4, 27.8, 14.9; IR (neat) 1669, 1624, 1461, 1438, 1274, 697, 647  $\text{cm}^{-1}$ ; HRMS (DART)  $m/z$  Calcd for  $\text{C}_{23}\text{H}_{21}\text{O}$  ( $\text{MH}^+$ ): 313.1587; found: 313.1583.

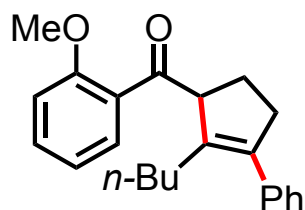

**(2-butyl-3-phenylcyclopent-2-en-1-yl)(2-methoxyphenyl)methanone (4e)**

According to the General Procedure, 1-(2-methoxyphenyl)dec-5-yn-1-one **1e** (25.8 mg, 0.10 mmol) reacted with iodobenzene **3a** (24.5 mg, 0.12 mmol) following the general procedure. After purification by column chromatography (Hexane:Ethyl acetate = 40:1), **4e** was obtained as a white solid (25.1 mg, 75%).  $^1\text{H NMR}$  (600 MHz,  $\text{CDCl}_3$ )  $\delta$  7.56 (d,  $J = 8.8$  Hz, 1H), 7.44 (t,  $J = 8.5$  Hz, 1H), 7.31 (dt,  $J = 14.0, 7.3$  Hz, 4H), 7.22 (t,  $J = 7.0$  Hz, 1H), 7.07 – 6.89 (m, 2H), 4.76 – 4.61 (m, 1H), 3.90 (s, 3H), 2.87 – 2.75 (m, 1H), 2.75 – 2.62 (m, 1H), 2.42 – 2.16 (m, 2H), 2.09 (dd,  $J = 13.3, 8.5$  Hz, 2H), 1.44 – 1.05 (m, 4H), 0.76 (t,  $J = 7.2$  Hz, 3H);  $^{13}\text{C NMR}$  (101 MHz,  $\text{CDCl}_3$ )  $\delta$  205.96, 157.91, 139.21, 138.39, 138.38, 132.78, 129.88, 129.78, 127.96, 127.86, 126.42, 120.67,

111.40, 59.94, 55.46, 36.55, 30.25, 27.87, 27.62, 22.69, 13.81; **IR** (neat) 2953, 1670, 1193, 1179, 906, 754, 727  $\text{cm}^{-1}$ ; HRMS (DART)  $m/z$  Calcd for  $\text{C}_{23}\text{H}_{27}\text{O}_2$  ( $\text{MH}^+$ ): 335.2006; found: 335.2012.

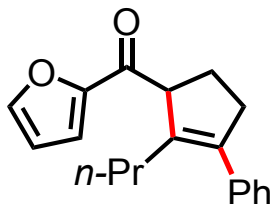

#### **furan-2-yl(3-phenyl-2-propylcyclopent-2-en-1-yl)methanone (4f)**

According to the General Procedure, 1-(furan-2-yl)non-5-yn-1-one **1f** (20.4 mg, 0.10 mmol) reacted with iodobenzene **3a** (24.5 mg, 0.12 mmol) following the general procedure. After purification by column chromatography (Hexane:Ethyl acetate = 40:1), **4f** was obtained as a colorless liquid (18.3 mg, 65%).  **$^1\text{H NMR}$**  (600 MHz,  $\text{CDCl}_3$ )  $\delta$  7.62 (s, 1H), 7.35 (t,  $J = 7.6$  Hz, 2H), 7.29 (d,  $J = 8.0$  Hz, 2H), 7.28 – 7.21 (m, 2H), 6.56 (s, 1H), 4.48 (dd,  $J = 9.1, 6.5$  Hz, 1H), 2.95 – 2.85 (m, 1H), 2.85 – 2.76 (m, 1H), 2.37 – 2.26 (m, 2H), 2.17 – 2.08 (m, 1H), 2.02 (t,  $J = 9.4$  Hz, 1H), 1.53 – 1.37 (m, 1H), 1.34 – 1.21 (m, 1H), 0.79 (t,  $J = 7.3$  Hz, 3H);  **$^{13}\text{C NMR}$**  (151 MHz,  $\text{CDCl}_3$ )  $\delta$  191.6, 152.7, 146.5, 140.1, 138.1, 137.2, 128.1, 127.8, 126.7, 117.5, 112.2, 56.5, 37.0, 30.1, 27.7, 21.4, 14.1; **IR** (neat) 3118, 1970, 1718, 1491, 1463, 1084, 834, 802  $\text{cm}^{-1}$ ; HRMS (DART)  $m/z$  Calcd for  $\text{C}_{19}\text{H}_{21}\text{O}_2$  ( $\text{MH}^+$ ): 281.1536; found: 281.1535.

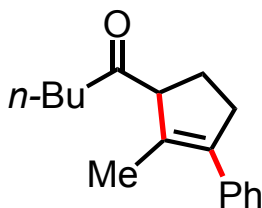

#### **1-(2-methyl-3-phenylcyclopent-2-en-1-yl)pentan-1-one (4g)**

According to the General Procedure, undec-9-yn-5-one **1g** (16.6 mg, 0.10 mmol) reacted with iodobenzene **3a** (24.5 mg, 0.12 mmol) following the general procedure. After purification by column chromatography (Hexane:Ethyl acetate = 40:1), **4g** was obtained as a colorless liquid (22.1 mg, 91%).  **$^1\text{H NMR}$**  (500 MHz,  $\text{CDCl}_3$ ) 7.35 (t,  $J = 7.6$  Hz, 2H), 7.30 (d,  $J = 7.0$  Hz, 2H), 7.25 (d,  $J = 7.1$  Hz, 1H), 3.72 – 3.59 (m, 1H), 2.91 – 2.72 (m, 2H), 2.47 (td,  $J = 17.0, 16.4, 7.5$  Hz, 2H), 2.22 (dd,  $J = 13.3, 6.3$  Hz, 1H), 1.99 (dd,  $J = 13.4, 8.5$  Hz, 1H), 1.78 (s, 3H), 1.59 (p,  $J = 7.2$  Hz, 2H), 1.32 (h,  $J = 7.3$  Hz, 2H), 0.92 (t,  $J = 7.3$  Hz, 3H);  **$^{13}\text{C NMR}$**  (126 MHz,  $\text{CDCl}_3$ ) 213.1, 139.4, 137.7, 132.7, 128.1, 127.8, 126.8, 64.7, 40.2, 36.5, 26.0, 25.8, 22.4, 14.6, 13.9; **IR** (neat) 2955,



1699, 1621, 1261, 1227, 762  $\text{cm}^{-1}$ ; HRMS (DART)  $m/z$  Calcd for  $\text{C}_{17}\text{H}_{23}\text{O}$  ( $\text{MH}^+$ ): 243.1743; found: 243.1739.

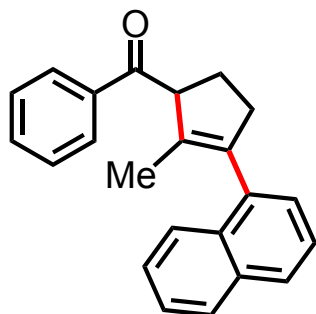

**(2-methyl-3-(naphthalen-1-yl)cyclopent-2-en-1-yl)(phenyl)methanone (4h)**

According to the General Procedure, 1-phenylnon-5-yn-1-one **1b** (18.6 mg, 0.10 mmol) reacted with 1-iodonaphthalene **3b** (30.5 mg, 0.12 mmol) following the general procedure. After purification by column chromatography (Hexane:Ethyl acetate = 40:1), **4h** was obtained as a bright yellow solid (28.8 mg, 92%).  $^1\text{H NMR}$  (600 MHz,  $\text{CDCl}_3$ )  $\delta$  8.1 (d,  $J = 8.2$  Hz, 3H), 7.9 (d,  $J = 8.1$  Hz, 1H), 7.8 (d,  $J = 8.1$  Hz, 1H), 7.6 (t,  $J = 7.9$  Hz, 1H), 7.6 – 7.4 (m, 5H), 7.3 (d,  $J = 6.8$  Hz, 1H), 4.7 (dd,  $J = 10.3, 5.1$  Hz, 1H), 2.9 (d,  $J = 9.0$  Hz, 1H), 2.8 (s, 1H), 2.6 – 2.5 (m, 1H), 2.3 (dd,  $J = 8.8, 4.7$  Hz, 1H), 1.5 (s, 3H);  $^{13}\text{C NMR}$  (126 MHz,  $\text{CDCl}_3$ )  $\delta$  202.2, 139.1, 137.1, 136.6, 134.9, 133.7, 133.0, 131.4, 128.7, 128.6, 128.2, 127.1, 126.1, 126.0, 125.7, 125.6, 125.4, 57.7, 38.6, 28.4, 14.4; **IR** (neat) 2921, 1676, 1594, 1320, 1252, 801, 777  $\text{cm}^{-1}$ ; HRMS (DART)  $m/z$  Calcd for  $\text{C}_{23}\text{H}_{21}\text{O}$  ( $\text{MH}^+$ ): 313.1587; found: 313.1591.

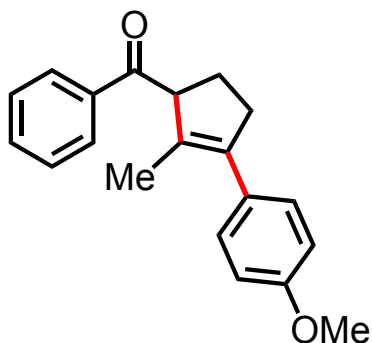

**(3-(4-methoxyphenyl)-2-methylcyclopent-2-en-1-yl)(phenyl)methanone (4i)**

According to the General Procedure, 1-phenylnon-5-yn-1-one **1b** (18.6 mg, 0.10 mmol) reacted with 1-iodo-4-methoxybenzene **3c** (28.1 mg, 0.12 mmol) following the general procedure. After purification by column chromatography (Hexane:Ethyl acetate = 40:1), **4i** was obtained as a yellow

solid (27.8 mg, 95%). **<sup>1</sup>H NMR** (600 MHz, CDCl<sub>3</sub>) δ 8.03 (d, *J* = 8.0 Hz, 2H), 7.57 (t, *J* = 7.4 Hz, 1H), 7.48 (t, *J* = 7.7 Hz, 2H), 7.28 (d, *J* = 8.6 Hz, 2H), 6.89 (d, *J* = 8.6 Hz, 2H), 4.62 – 4.52 (m, 1H), 3.81 (s, 3H), 2.83 (t, *J* = 7.3 Hz, 2H), 2.44 – 2.29 (m, 1H), 2.14 – 2.01 (m, 1H), 1.79 (s, 3H); **<sup>13</sup>C NMR** (101 MHz, CDCl<sub>3</sub>) δ 202.3, 158.2, 138.4, 137.1, 132.9, 131.7, 130.3, 129.0, 128.6, 128.5, 113.5, 58.9, 55.2, 36.4, 27.6, 14.9; **IR** (neat) 2929, 1675, 1508, 1243, 1208, 1176, 829, 696 cm<sup>-1</sup>; HRMS (DART) *m/z* Calcd for C<sub>20</sub>H<sub>21</sub>O<sub>2</sub> (MH<sup>+</sup>): 293.1536; found: 293.1541.

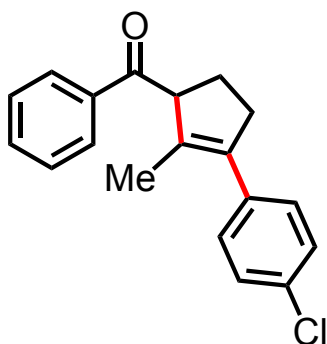

**(3-(4-chlorophenyl)-2-methylcyclopent-2-en-1-yl)(phenyl)methanone (4j)**

According to the General Procedure, 1-phenylnon-5-yn-1-one **1b** (18.6 mg, 0.10 mmol) reacted with 1-chloro-4-iodobenzene **3d** (28.6 mg, 0.12 mmol) following the general procedure. After purification by column chromatography (Hexane:Ethyl acetate = 40:1), **4j** was obtained as a colorless liquid (27.6 mg, 93%). **<sup>1</sup>H NMR** (500 MHz, CDCl<sub>3</sub>) δ 8.03 (d, *J* = 8.3 Hz, 2H), 7.59 (t, *J* = 7.9 Hz, 1H), 7.50 (t, *J* = 7.7 Hz, 2H), 7.32 (d, *J* = 8.2 Hz, 2H), 7.27 (d, *J* = 8.9 Hz, 2H), 4.59 (d, *J* = 15.7 Hz, 1H), 2.82 (t, *J* = 7.2 Hz, 2H), 2.47 – 2.31 (m, 1H), 2.10 (dq, *J* = 13.1, 6.3 Hz, 1H), 1.78 (s, 3H); **<sup>13</sup>C NMR** (101 MHz, CDCl<sub>3</sub>) δ 202.0, 138.0, 137.0, 136.2, 133.9, 133.1, 132.3, 129.2, 128.7, 128.5, 128.2, 58.7, 36.3, 27.7, 14.9; **IR** (neat) 2933, 1675, 1445, 1341, 1208, 1091, 826 cm<sup>-1</sup>; HRMS (DART) *m/z* Calcd for C<sub>19</sub>H<sub>18</sub>O<sub>1</sub>Cl (MH<sup>+</sup>): 297.1041; found: 297.1041.

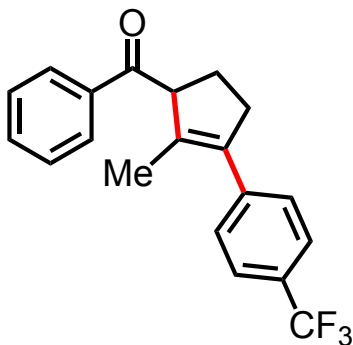

**(2-methyl-3-(4-(trifluoromethyl)phenyl)cyclopent-2-en-1-yl)(phenyl)methanone (4k)**

According to the General Procedure, 1-phenylnon-5-yn-1-one **1b** (18.6 mg, 0.10 mmol) reacted with 1-iodo-4-(trifluoromethyl)benzene **3e** (32.7 mg, 0.12 mmol) following the general procedure. After purification by column chromatography (Hexane:Ethyl acetate = 40:1), **4k** was obtained as a colorless liquid (30.1mg, 91%). <sup>1</sup>H NMR (500 MHz, CDCl<sub>3</sub>) δ 8.04 (d, *J* = 7.4 Hz, 2H), 7.60 (t, *J* = 7.9 Hz, 3H), 7.50 (t, *J* = 7.8 Hz, 2H), 7.44 (d, *J* = 8.3 Hz, 2H), 4.68 – 4.57 (m, 1H), 2.95 – 2.76 (m, 2H), 2.48 – 2.36 (m, 1H), 2.17 – 2.05 (m, 1H), 1.81 (s, 3H); <sup>13</sup>C NMR (101 MHz, CDCl<sub>3</sub>) δ 201.77, 141.47, 141.46, 137.97, 136.94, 135.35, 133.15, 128.71, 128.55, 124.31 (q, *J* = 272.7 Hz), 125.06 (q, *J* = 3.8 Hz), 124.95, 58.71, 36.23, 27.74, 14.88; <sup>19</sup>F NMR (564 MHz, CDCl<sub>3</sub>) δ –62.44; IR (neat) 1677, 1322, 1163, 1067, 886,

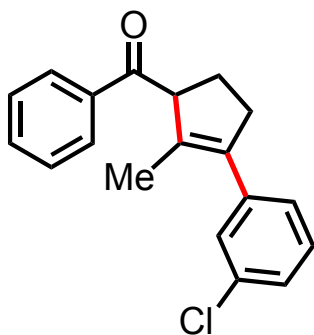

**(3-(3-chlorophenyl)-2-methylcyclopent-2-en-1-yl)(phenyl)methanone (4l)**

According to the General Procedure, 1-phenylnon-5-yn-1-one **1b** (18.6 mg, 0.1 mmol) reacted with 1-chloro-3-iodobenzene **3f** (28.6 mg, 0.12 mmol) following the general procedure. After purification by column chromatography (Hexane:Ethyl acetate = 40:1), **4l** was obtained as a colorless liquid (27.3 mg, 92%). <sup>1</sup>H NMR (500 MHz, CDCl<sub>3</sub>) δ 8.0 (d, *J* = 8.0 Hz, 2H), 7.6 (t, *J* = 6.9 Hz, 1H), 7.5 (t, *J* = 7.7 Hz, 2H), 7.3 (s, 1H), 7.3 – 7.2 (m, 1H), 7.2 (d, *J* = 9.2 Hz, 2H), 4.7 – 4.5 (m, 1H), 2.8 (dd, *J* = 4.2, 2.2 Hz, 2H), 2.4 – 2.3 (m, 1H), 2.2 – 2.0 (m, 1H), 1.8 (s, 3H); <sup>13</sup>C NMR (101 MHz, CDCl<sub>3</sub>) δ 201.8, 139.6, 137.8, 137.0, 134.5, 133.9, 133.1, 129.3, 128.7, 128.5, 127.9, 126.7, 126.0, 58.7, 36.2, 27.7, 14.8; IR (neat) 1672, 1577, 1211, 1177, 786, 750, 711, 694 cm<sup>-1</sup>; HRMS (DART) *m/z* Calcd for C<sub>19</sub>H<sub>18</sub>O<sub>1</sub>Cl (MH<sup>+</sup>): 297.1041; found: 297.1047.

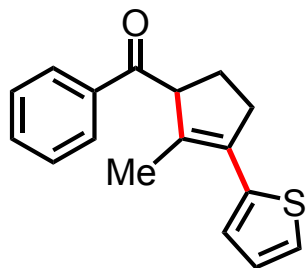

**(2-methyl-3-(thiophen-2-yl)cyclopent-2-en-1-yl)(phenyl)methanone (4m)**

According to the General Procedure, 1-phenylnon-5-yn-1-one **1b** (18.6 mg, 0.1 mmol) reacted with 2-iodothiophene **3g** (25.2 mg, 0.12 mmol) following the general procedure. After purification by column chromatography (Hexane:Ethyl acetate = 40:1), **4m** was obtained as a white solid (22.8 mg, 85%). <sup>1</sup>H NMR (400 MHz, CDCl<sub>3</sub>) δ 8.1 – 8.0 (m, 2H), 7.6 (t, *J* = 7.4 Hz, 1H), 7.5 (t, *J* = 7.6 Hz, 2H), 7.3 – 7.2 (m, 1H), 7.0 (d, *J* = 4.5 Hz, 2H), 4.7 – 4.5 (m, 1H), 3.1 – 2.8 (m, 2H), 2.5 – 2.3 (m, 1H), 2.2 – 2.0 (m, 1H), 2.0 (s, 3H); <sup>13</sup>C NMR (151 MHz, CDCl<sub>3</sub>) δ 201.8, 140.0, 136.9, 133.0, 132.8, 132.1, 128.6, 128.5, 126.7, 125.0, 124.4, 59.4, 36.2, 27.6, 15.6; IR (neat) 1674, 1594, 1374, 1338, 1177, 1158, 694 cm<sup>-1</sup>; HRMS (DART) *m/z* Calcd for C<sub>17</sub>H<sub>17</sub>O<sub>1</sub>S (MH<sup>+</sup>):269.0995; found: 269.0994.

#### 4. References

- (1) M. Cao, A. Yesilcimen and M. Wasa, *J. Am. Chem. Soc.* 2019, **141**, 4199.

## 5. NMR Spectra for New Compounds

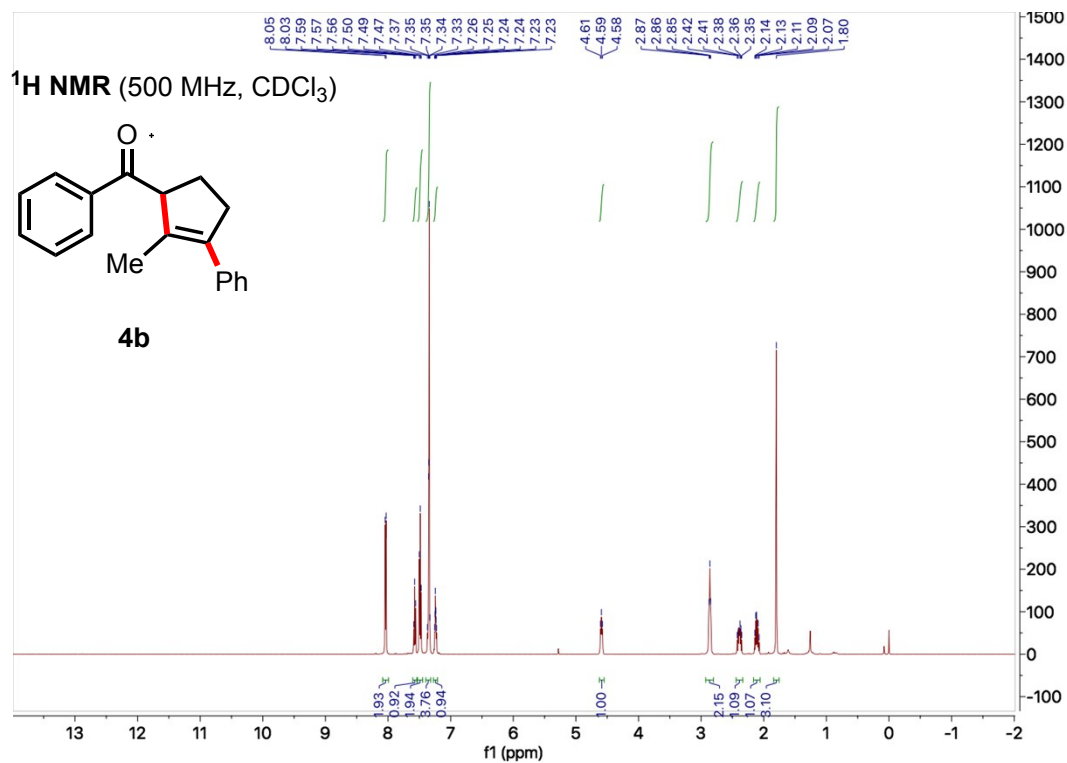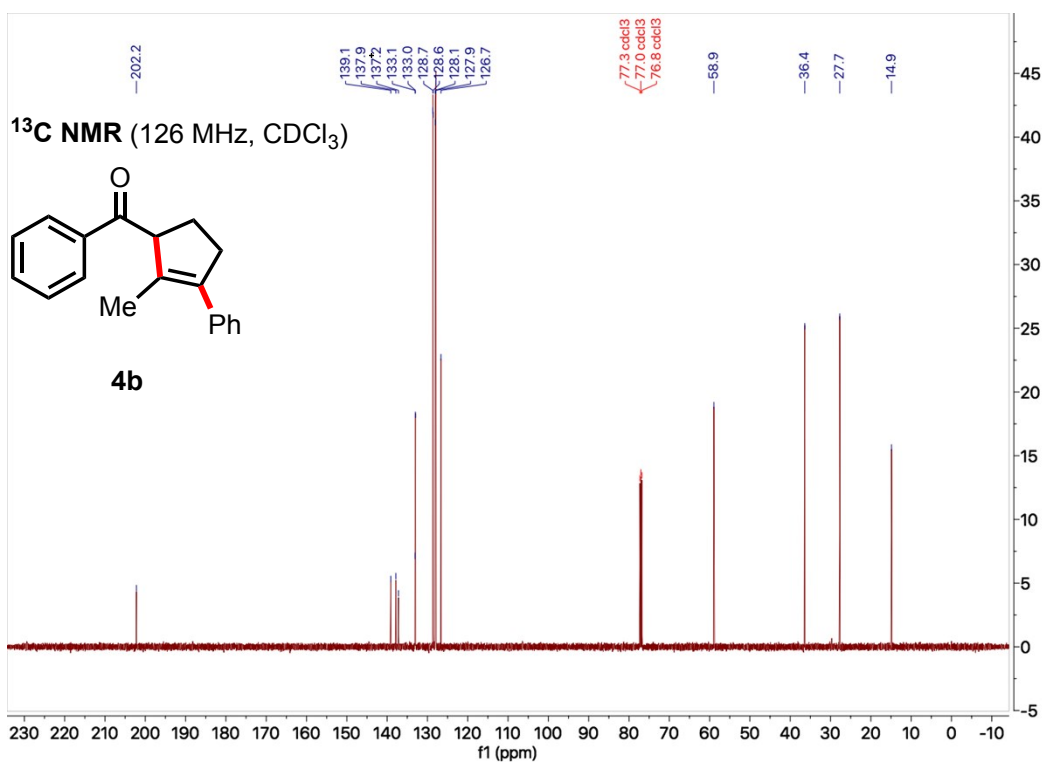

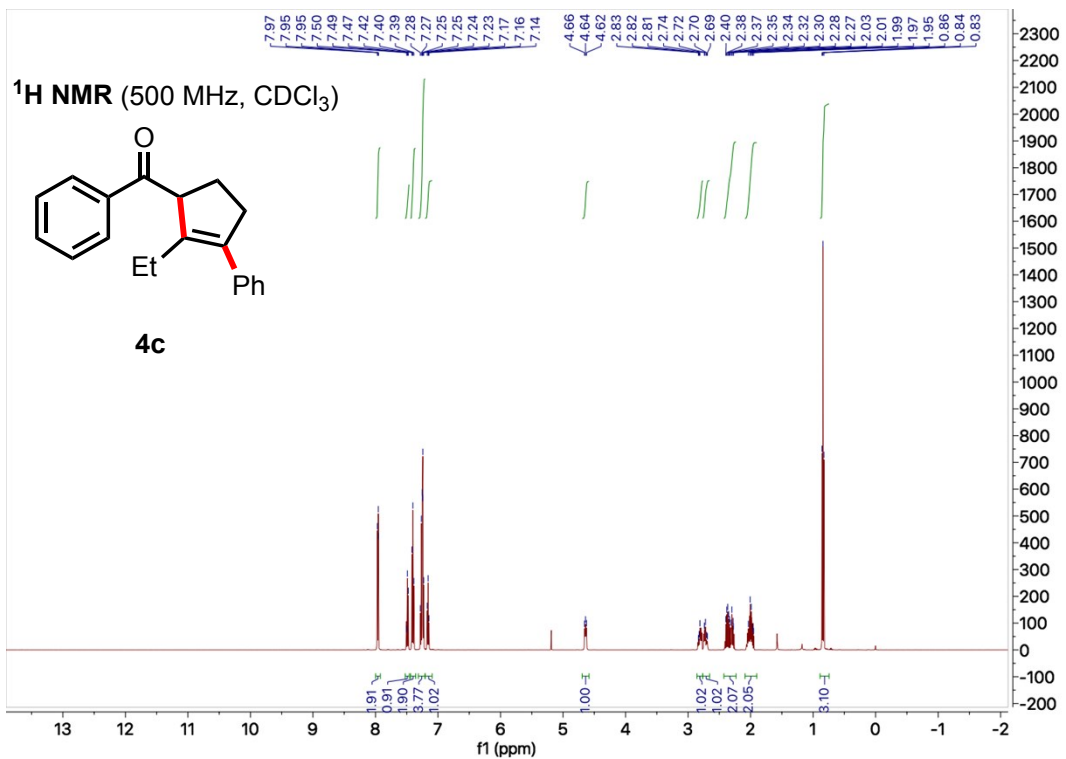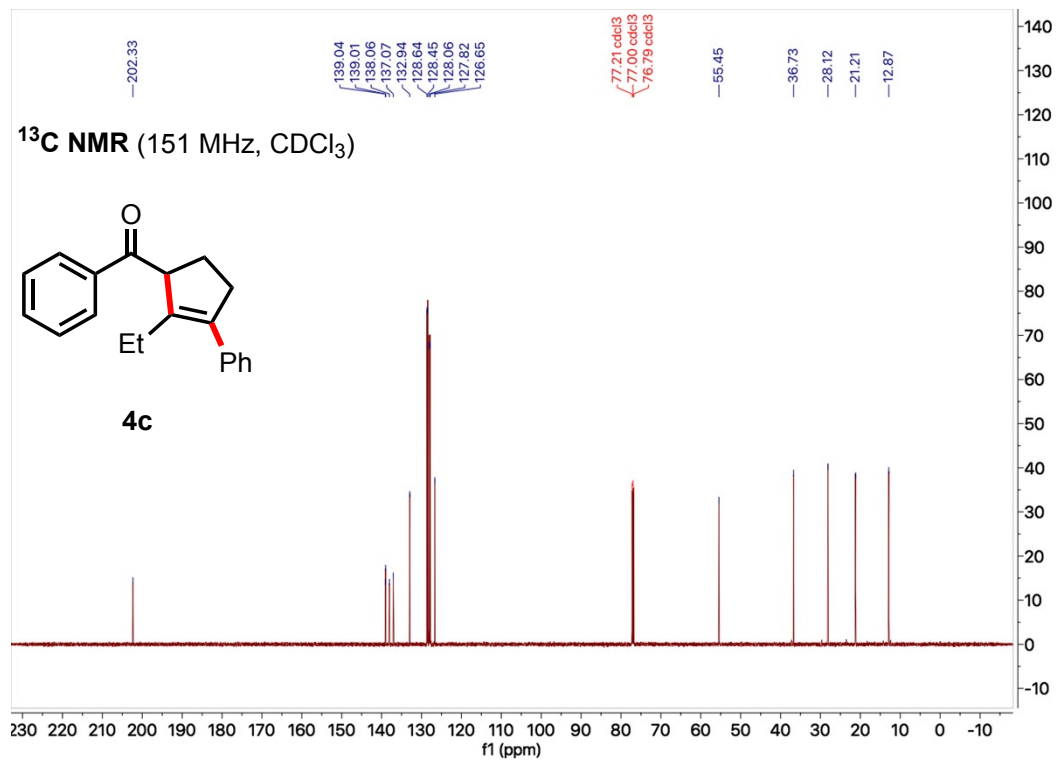

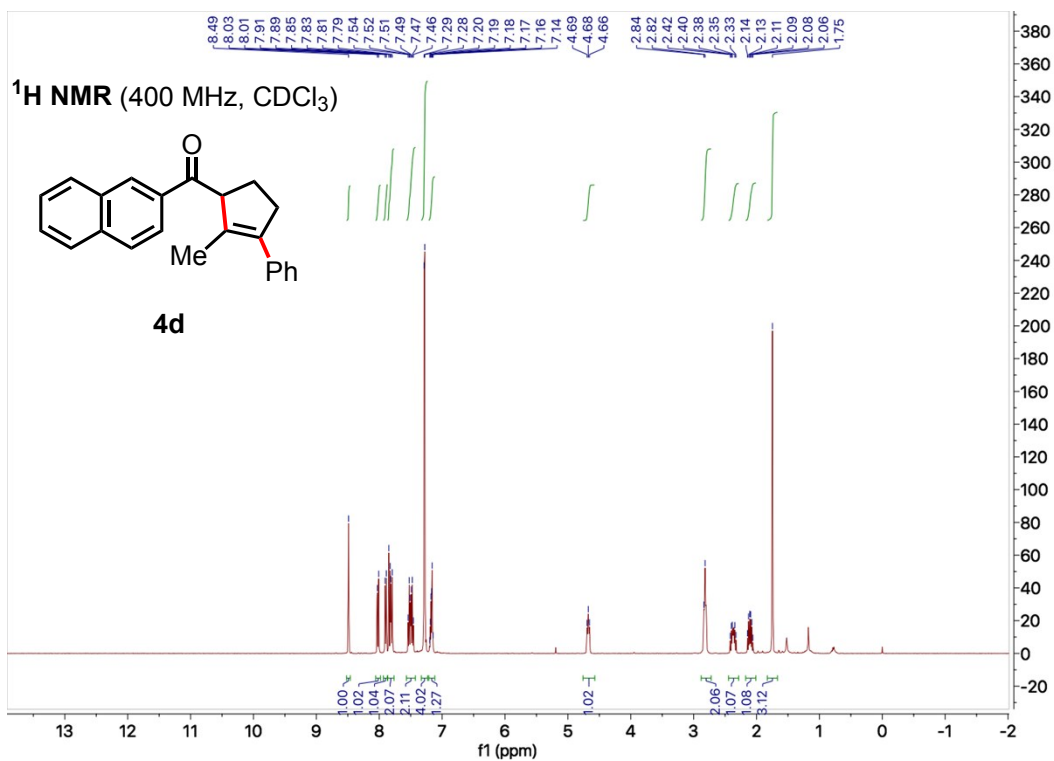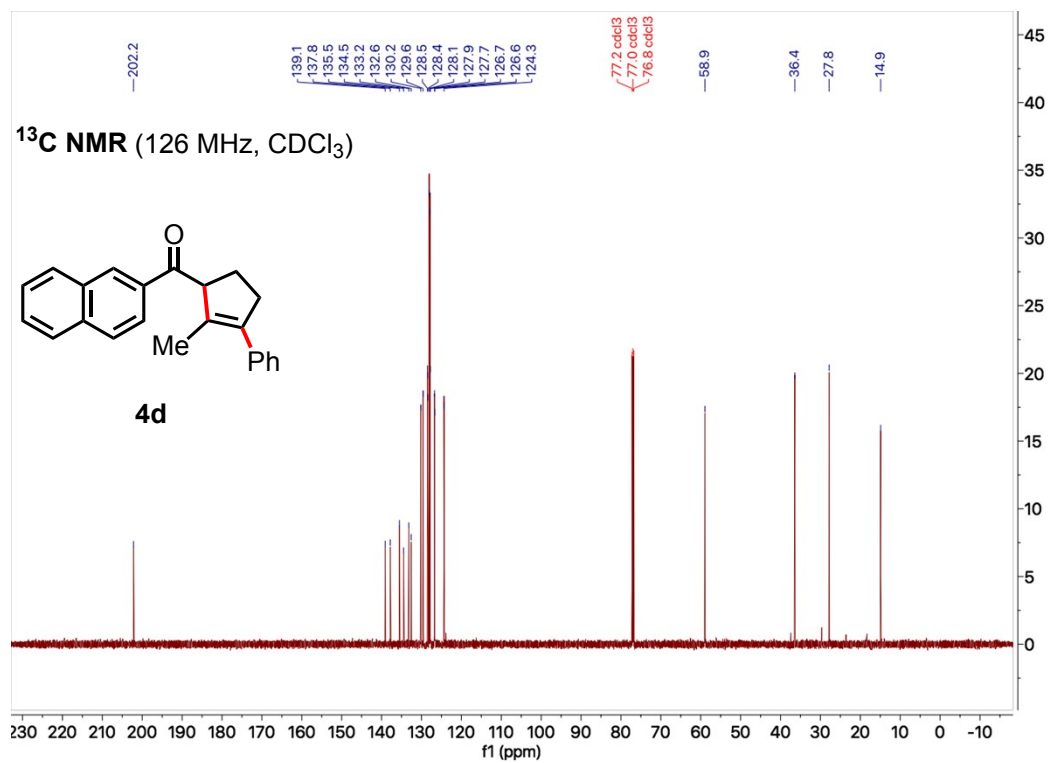



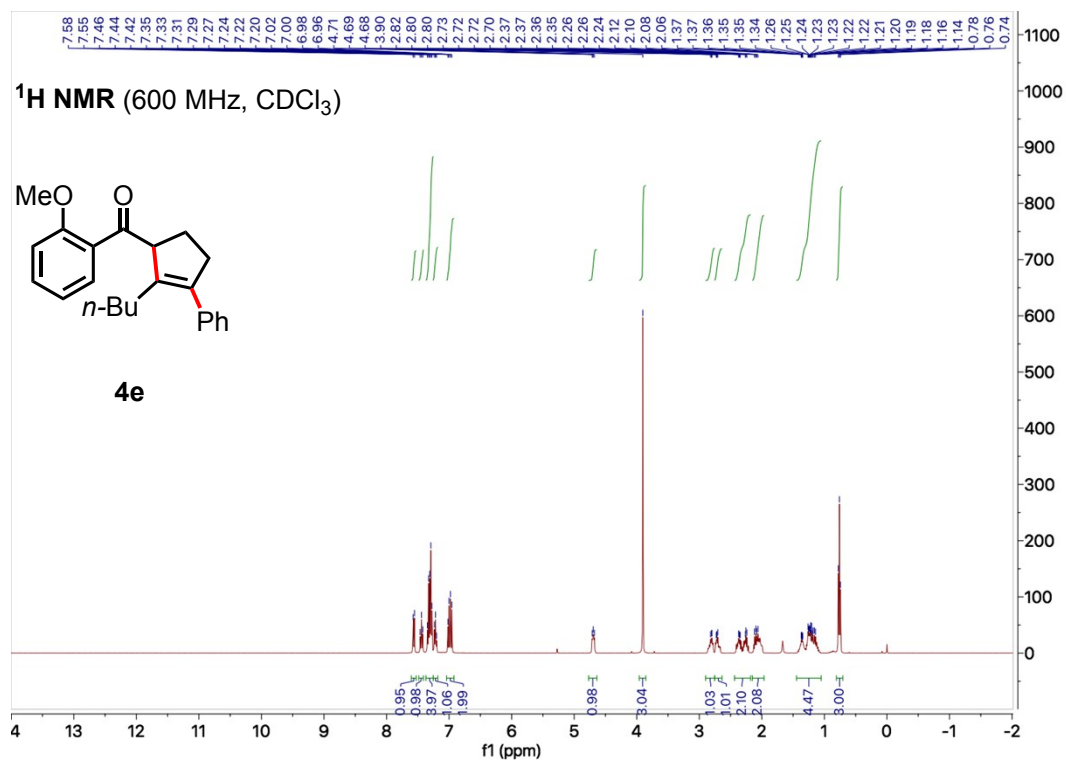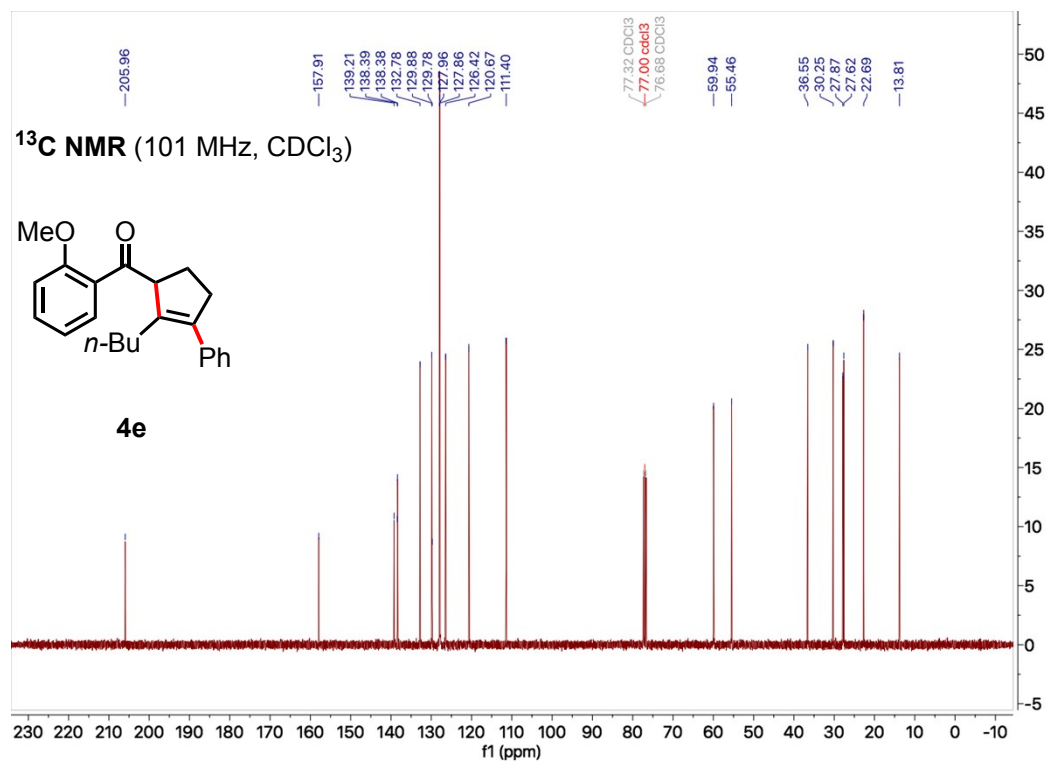

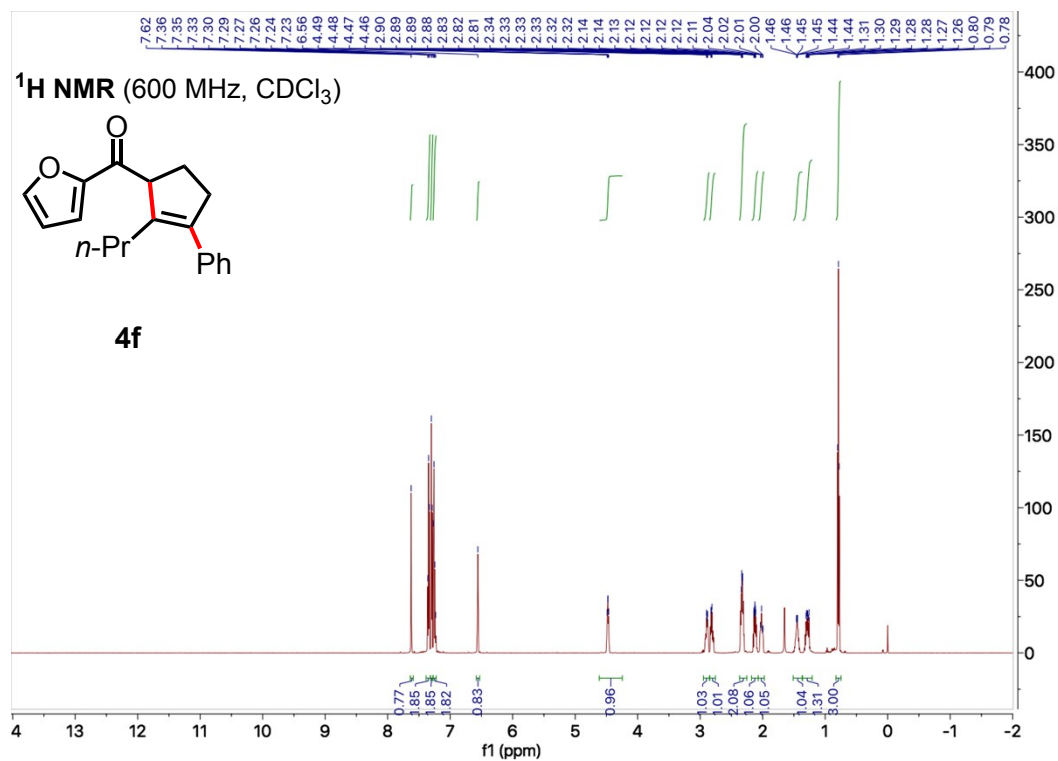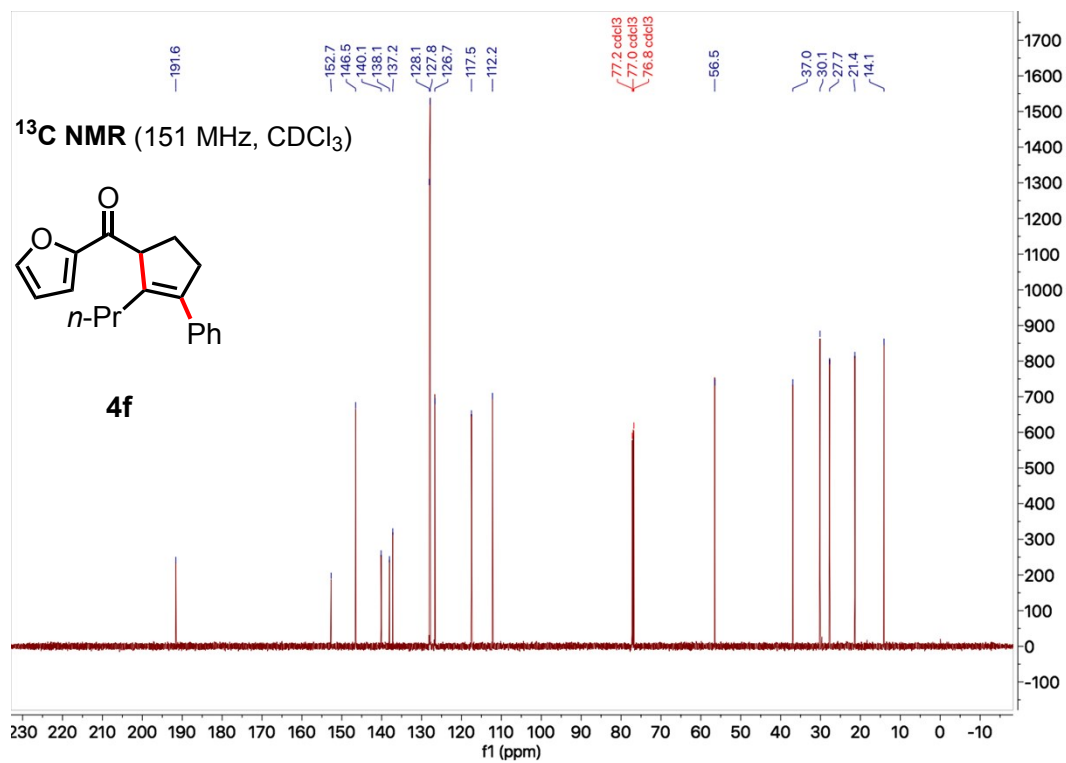

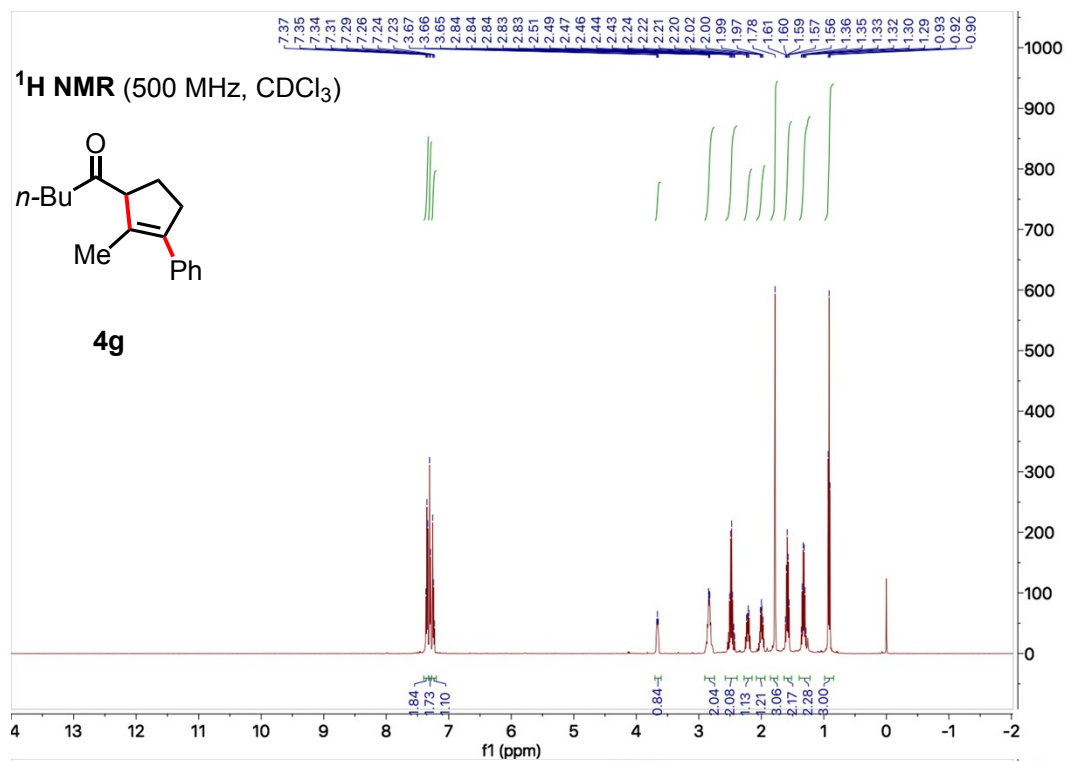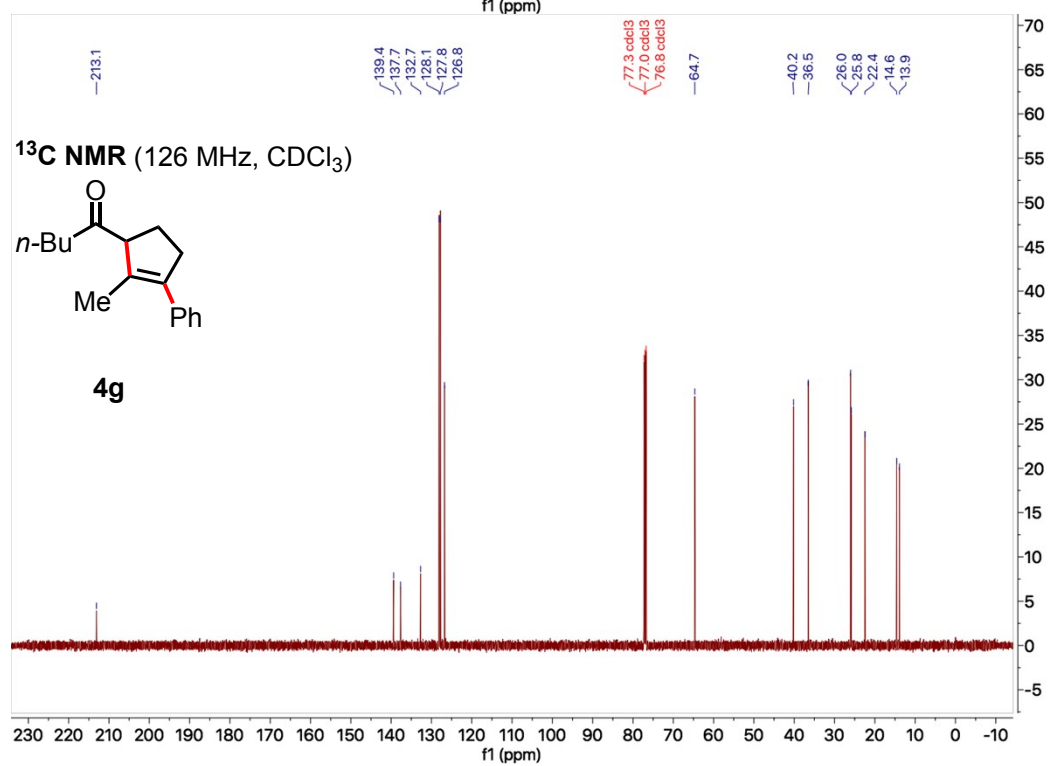

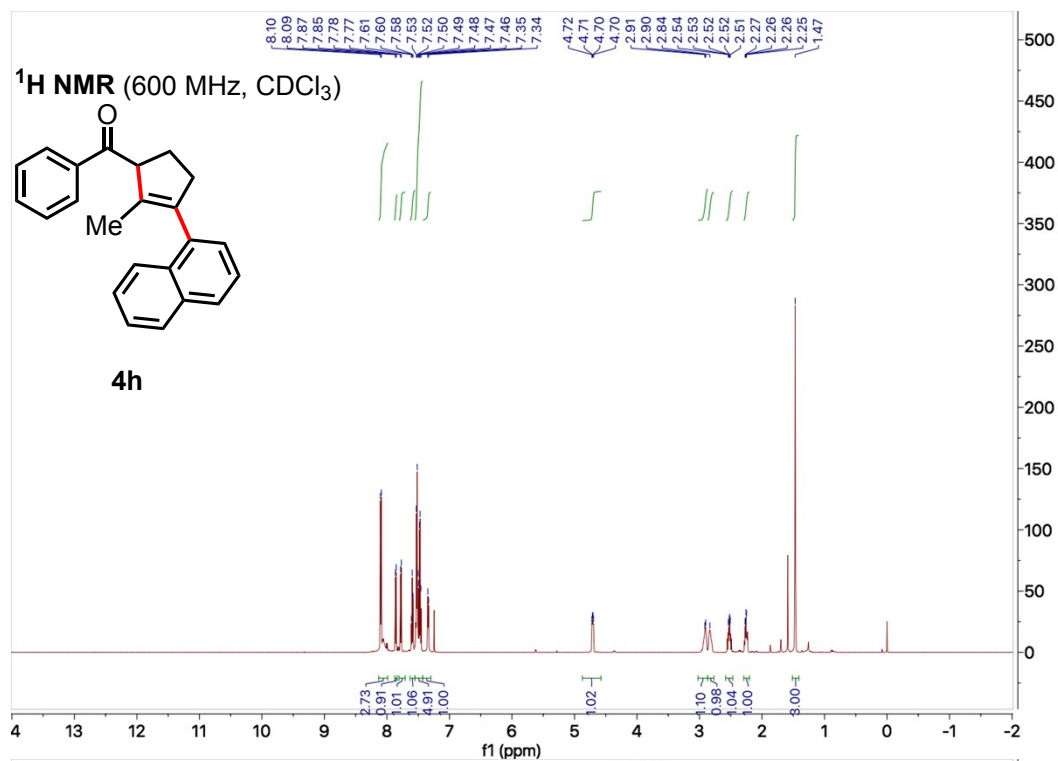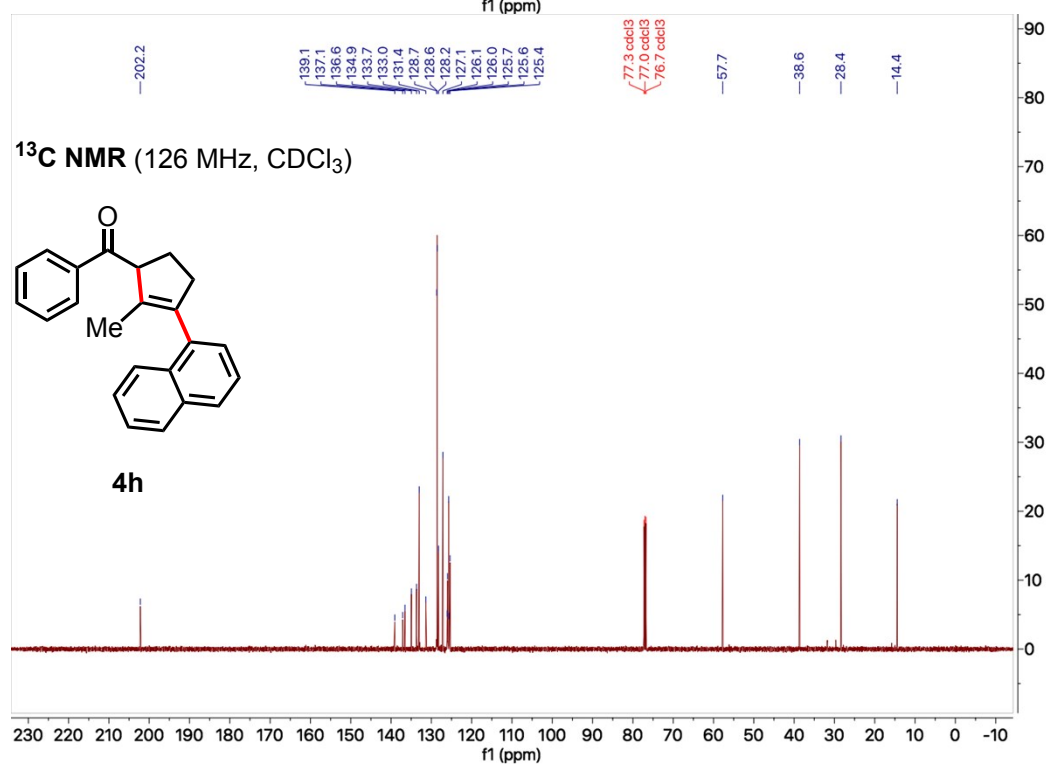

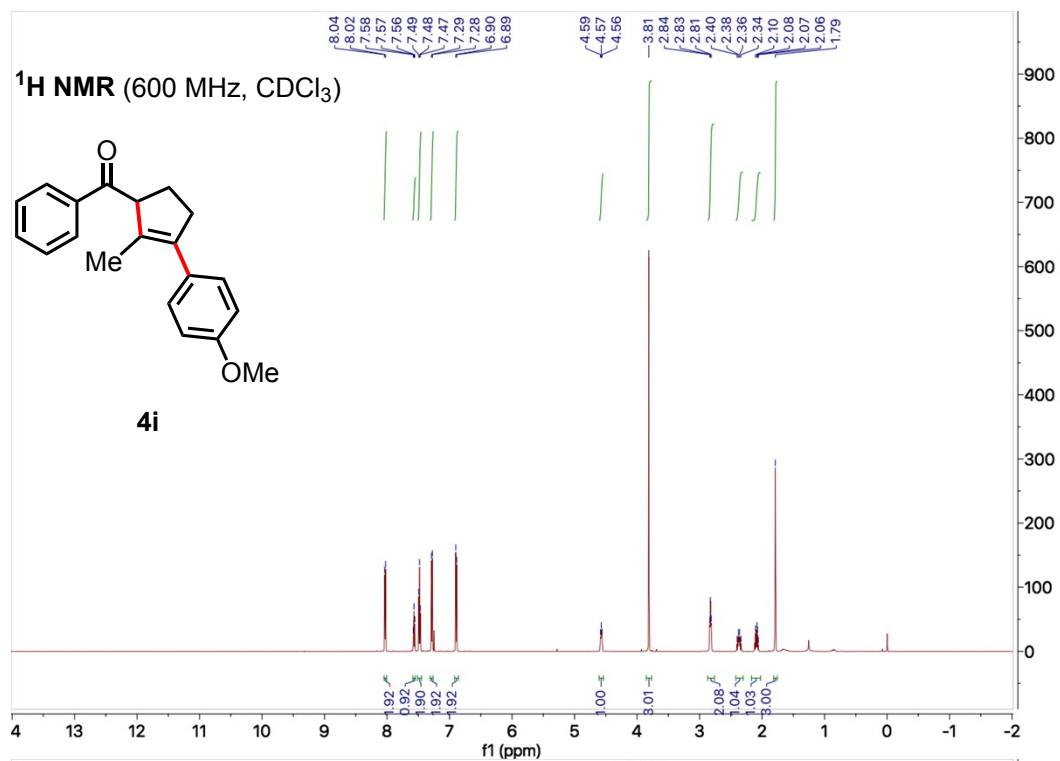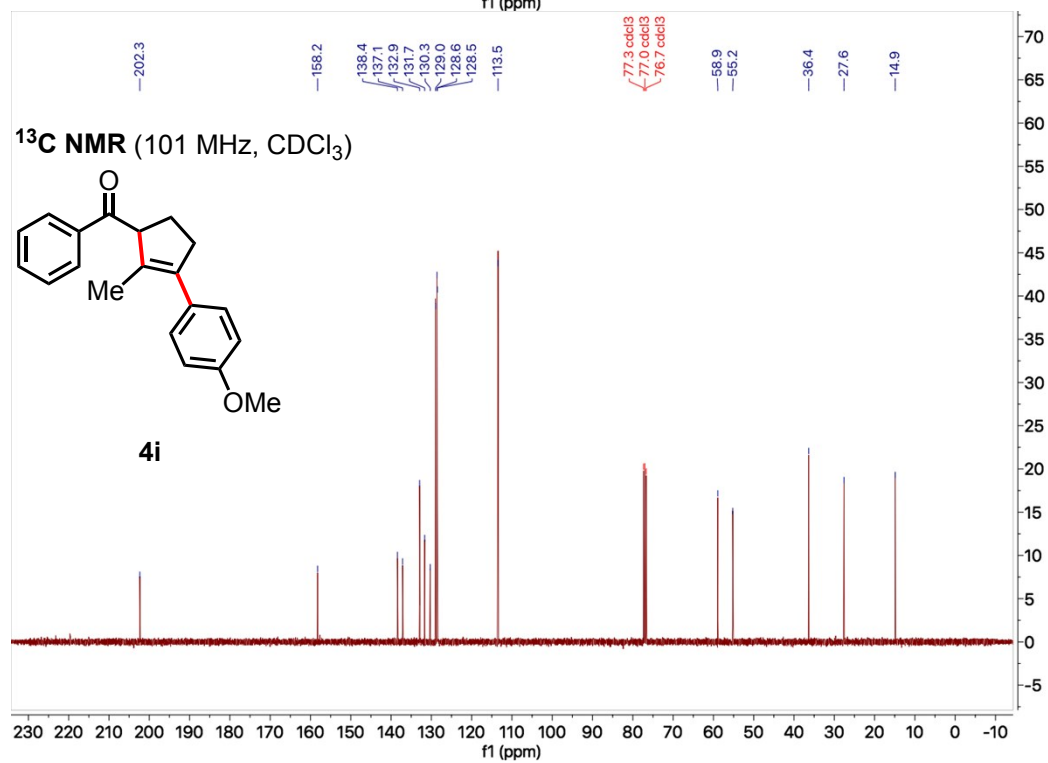

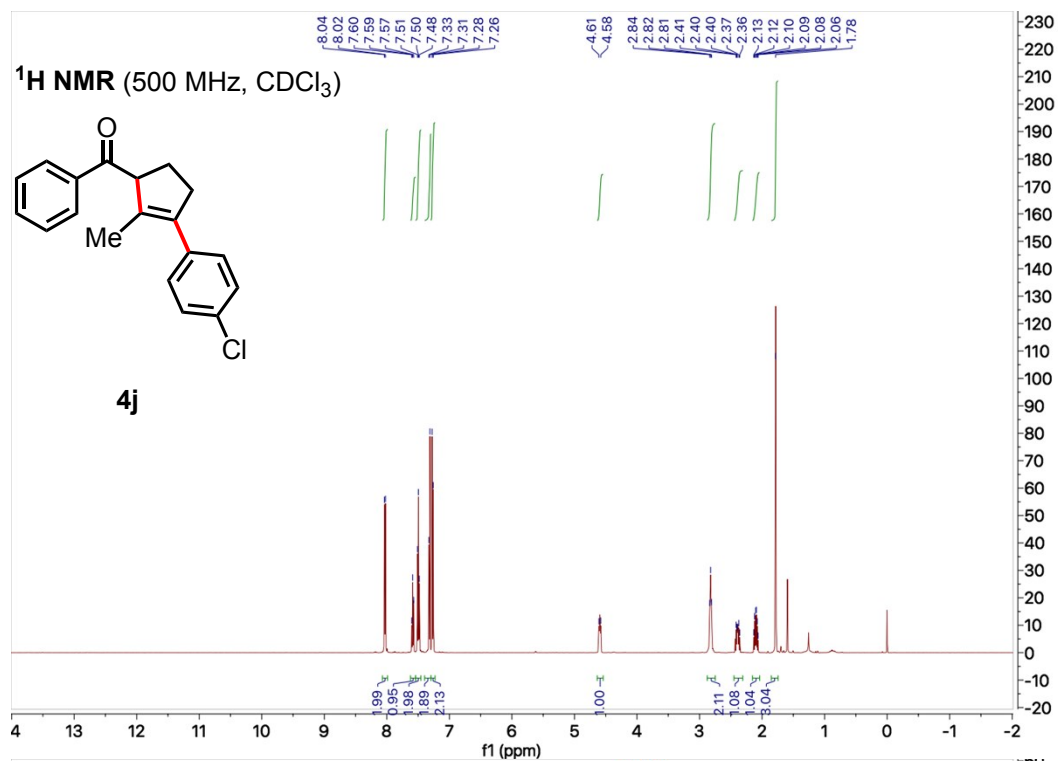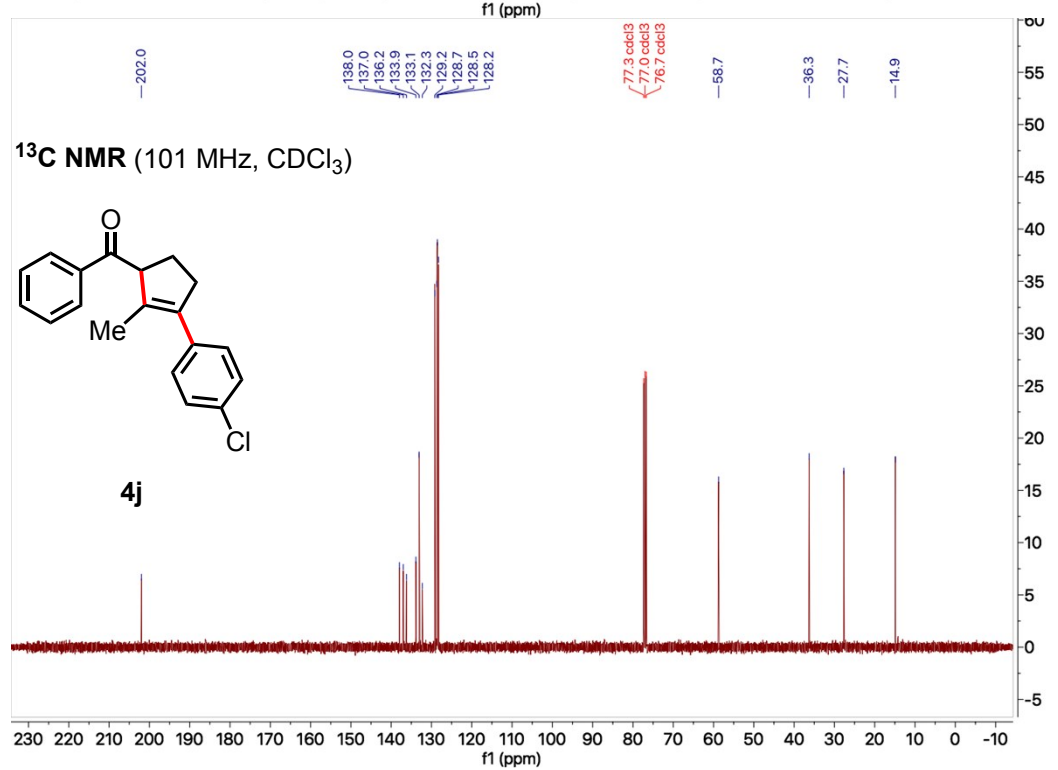

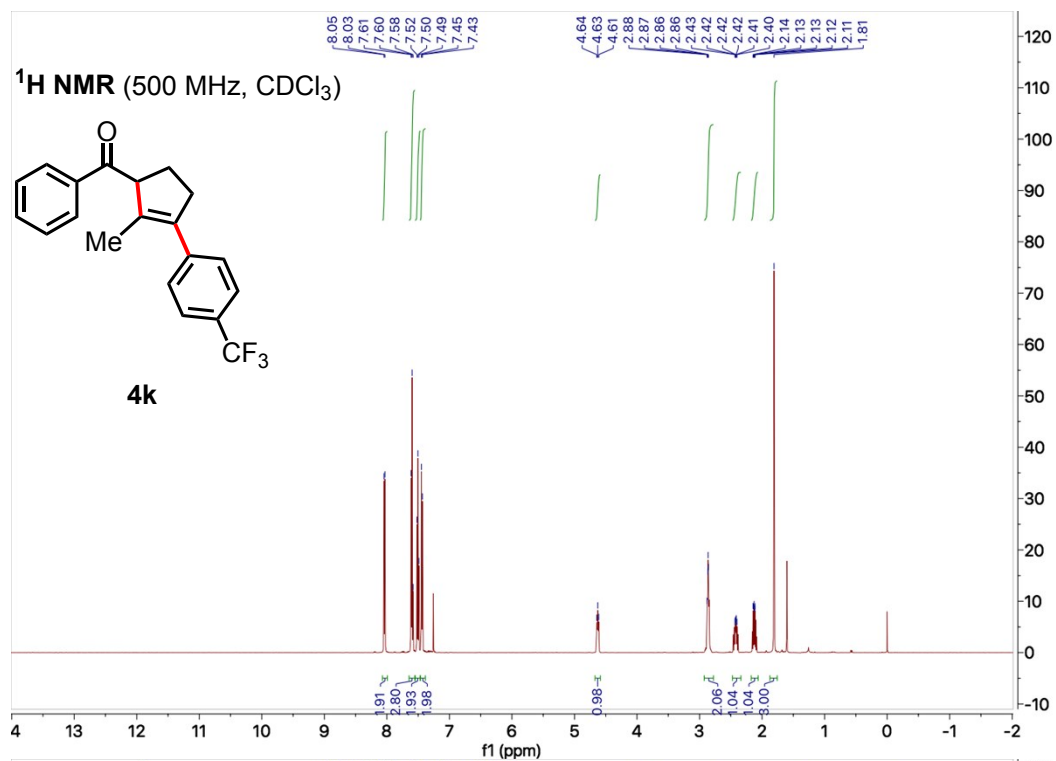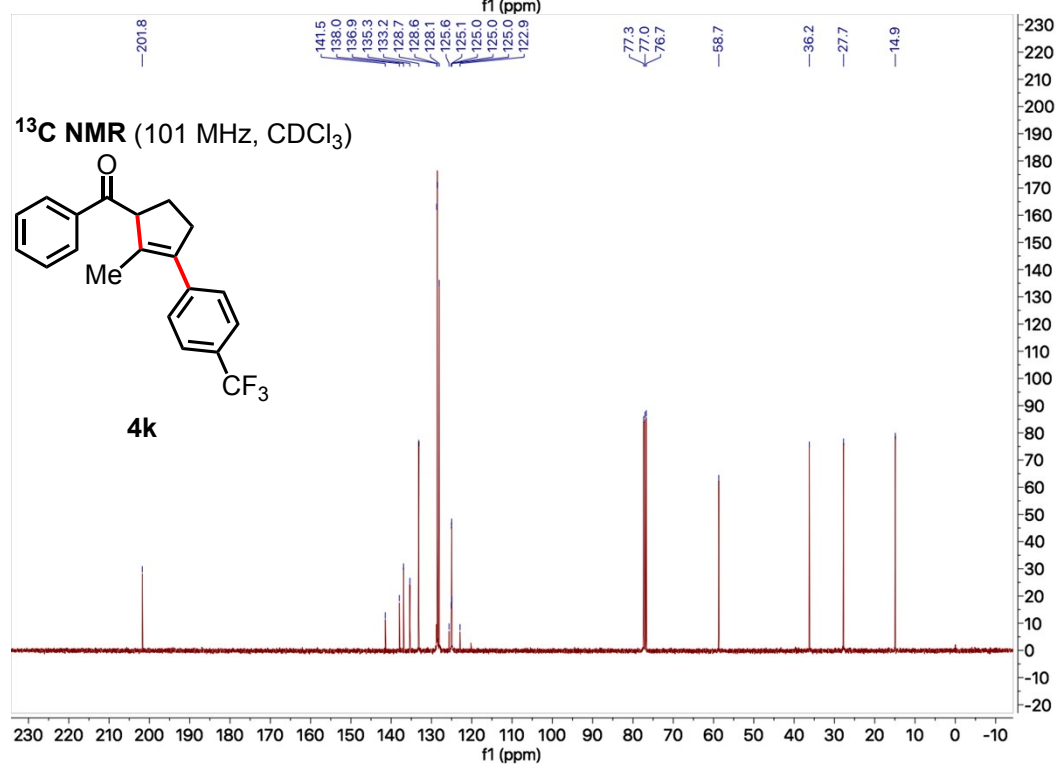

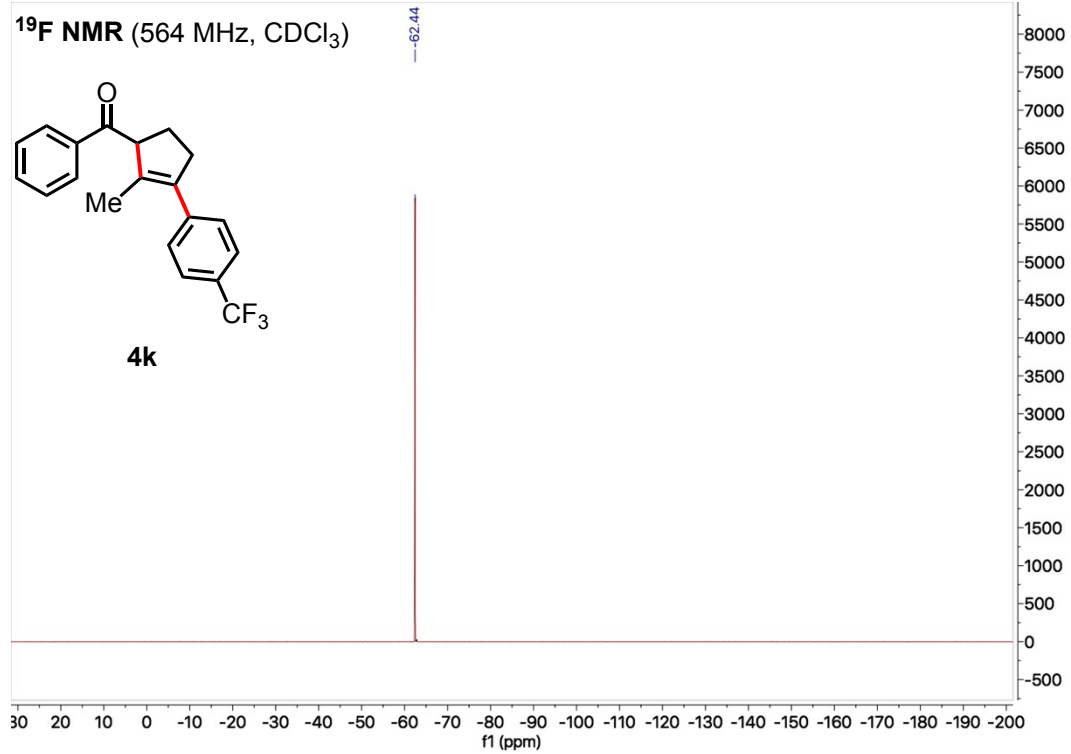



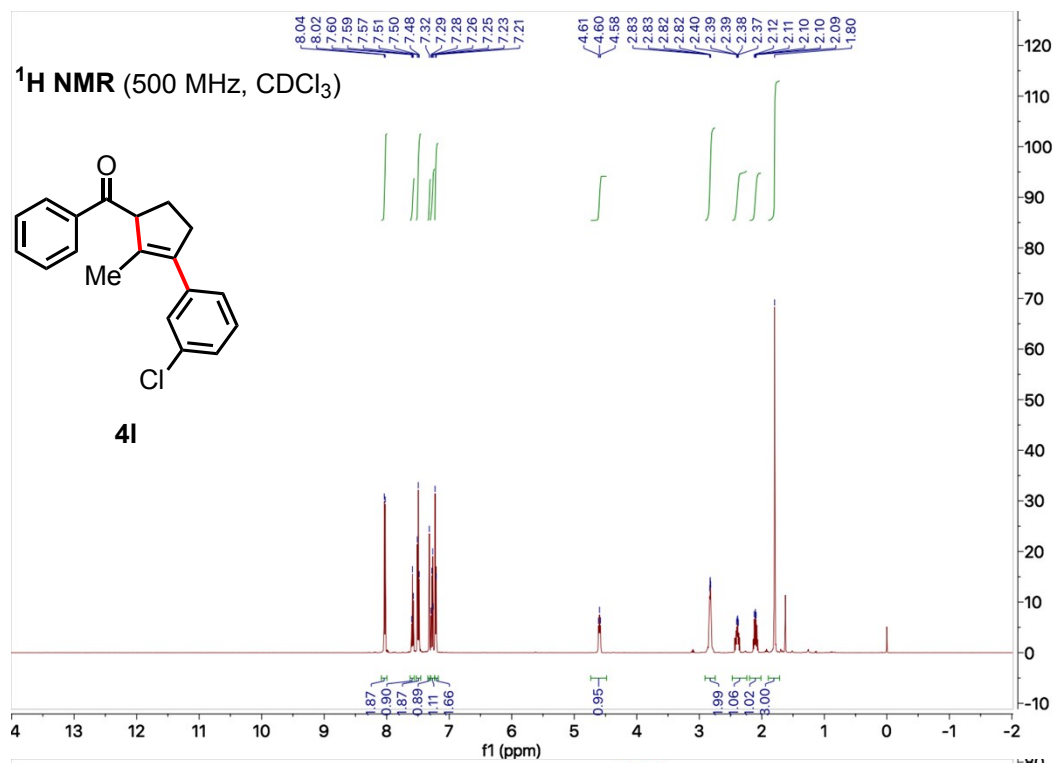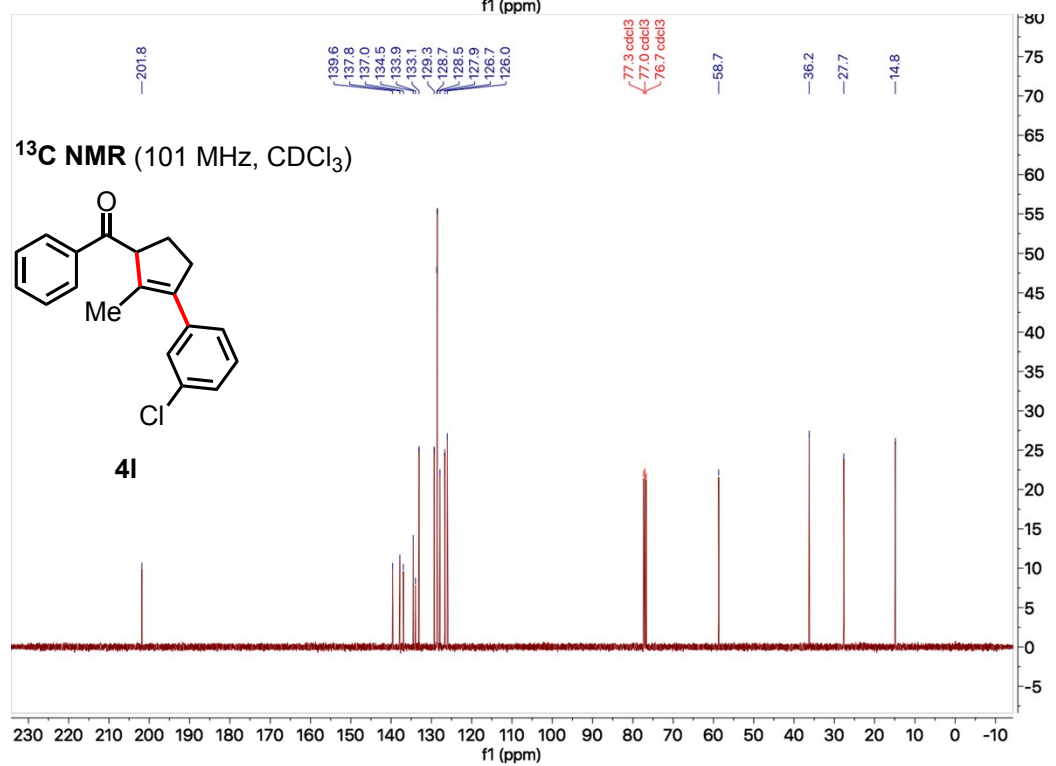

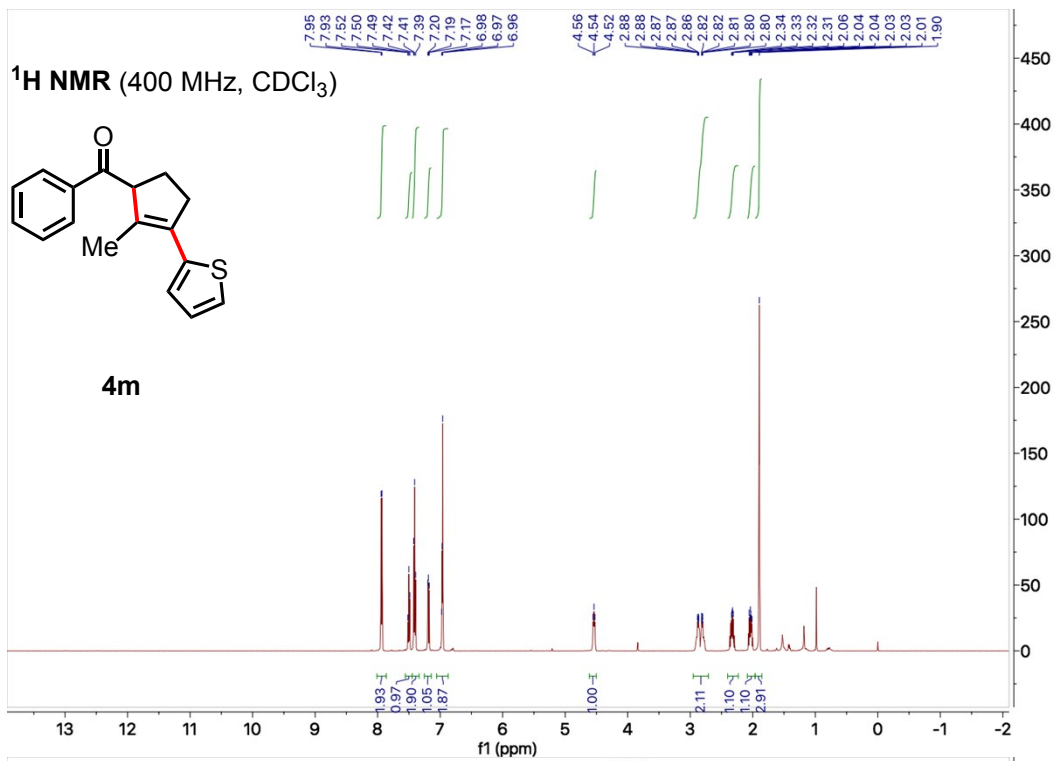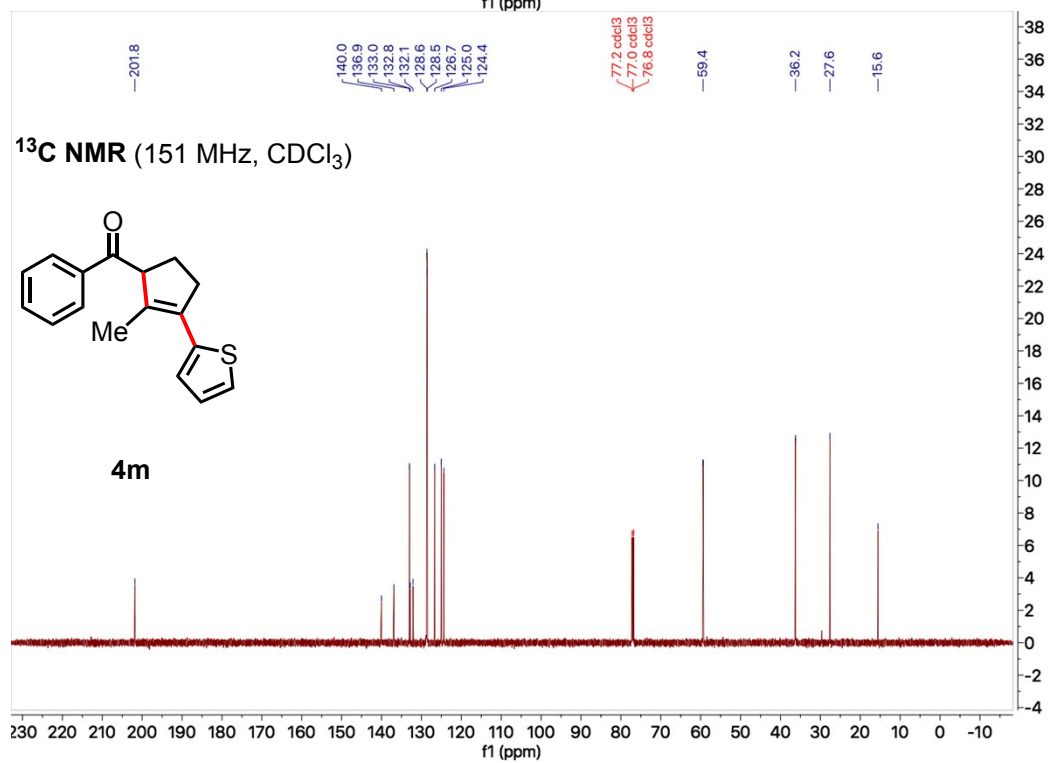

Supplement: d0ob01678k1.pdf [file d0ob01678k1.pdf]
